# Supplementary material for: Calfacilitin is a calcium channel modulator essential for initiation of neural plate development
Source: PubMed Central journal article supplement (PMC3674269; doi:10.1038/ncomms2864), 2013-05-14
Supplement: ncomms2864-s1.pdf [file ncomms2864-s1.pdf]

**Supplementary Fig. S1. Calfacilitin is conserved among different species.**

```

Calfacilitin      ---MGPGRAPSAALVGGSVLFGALRRAALALPRPAAVRSRPGRVWRWRNLLVSFAHSV
Human            ----MPRLLHPALPLLLGATLTFRALRRALCRLPLPVHVRADPLRTWRWHNLLVSFAHSI
Chimpanzee       ----MPRLLHPALPLLLGATLTFRALRRALCRLPLPVHVRADPLRTWRWHNLLVSFAHSI
Mouse            ----MPLLFHPAWPLLLGATLTFRALRRVLCRLPQPAHVQTDPLRTWRWHNLLVSFTHSI
Zebrafish        MDTWLNEVQKFPVLYVLCSSVLFRIHWCLOIVARPDTVTKDRWKTWKWRNLSVSLVHSL
                  .   :   .   *   * :   : . * *   : * : * * * * : * : * :

```

```

Calfacilitin      LAGLWALFSLWQSPELLSDIQDGYSVSGHLLVCFSSGYFIHDSLDIIFNQQRSSWEYLV
Human            VSGIWALLCVWQTPDMLVEIETAWSLSGYLLVCFSSAGYFIHDTVDIVASGQTRASWEYLV
Chimpanzee       VSGIWALLCVWQTPDMLVEIETAWSLSGYLLVCFSSAGYFIHDTVDIVTSGQTRASWEYLV
Mouse            VSGIWALLCLWQTPMLVEIETAWSASGYLLVCFSSAGYFIHDTVDIVSKQTRASWEYLV
Zebrafish        LTGTWAVACVIYYPAMVHEIHSTYTPSAYMLVVSSGYFIEDAADIVFSGHAKASWEFL
                  : * * : . :   * : : * . : : * : * : * . * : * : * : * : * :

```

```

Calfacilitin      HHAMAI SAFVSLIITGRFLVAAMLLLVEVSNIFLTIRMLLKMS-NVPSPALYEANKYVN
Human            HHVMAMGAFFSGIFWSSFVGGVLTLLVEVSNIFLTIRMMMKIS-NAQDHLLYRVNKYVN
Chimpanzee       HHVMAMGAFFSGIFWSSFVGGVLTLLVEVSNIFLTIRMMMKIS-NAQDHLLYRVNKYVN
Mouse            HHVMAMGAFFSGIFWKRFVGGVLTLLVEVSNIFLTLRMMMKIN-NAQDLLLYKVNKYIN
Zebrafish        HHVLVLWCFLYAVFTHQYVAGAVVALFVEVNSVFLHTRLLLNLAKVAHSSLIYTVNKVLN
                  * * . : . * . : :   : : . : : * : * : * : * * * : * : * : * :

```

```

Calfacilitin      LVMYFARLAPQVYLTWYFVRYVEVQGGAFMANLLLLDAMILMYFSRLLRSDFPFLR
Human            LVMYFLFRLAPQAYLTHFFLRYVNQRTLGTFLLGILLMLDVMIIYFSRLLRSDFCP---
Chimpanzee       LVMYFLFRLAPQAYLTHFFLRYVNQRTLGTFLLGILLMLDVMIIYFSRLLRSDFCP---
Mouse            LVMYFLFRLAPQAYLTKFFLQYAGQRTLGTFLLAILLMLDLMIIIYFSRLLRSDFCP---
Zebrafish        VVTYVTFRLGAQFYLTWYLYHYSSLDYALYFLITMMLNIMILIYFYRLIRSDFFTKRR
                  : * * . * * . * * * * : :   :   . : : :   : : : * * : * * * * * .

```

```

Calfacilitin      KGSVGRDVDGEKFLID
Human            -EHVPPKQHKDKFLTE
Chimpanzee       -EHVPPKQHKDKFLTE
Mouse            -ERAPRRQQKDKFLTE
Zebrafish        IQNGIQKLAAD-----
                  :   :

```

Sequence alignment of the predicted protein sequence of Calfacilitin with its putative orthologues in other species. Chick Calfacilitin has been submitted to GenBank and assigned accession number GQ504719. Orthologues: Zebrafish: AAH83250.1; Mouse: NP\_080984; Chimpanzee: XP\_511362.1; Human: BC014072.1. Shaded areas correspond to the predicted transmembrane domains, which are conserved.

**Supplementary Fig. S2. Lack of effect of calfacilitin on  $Ca_v1.3$  channels.**

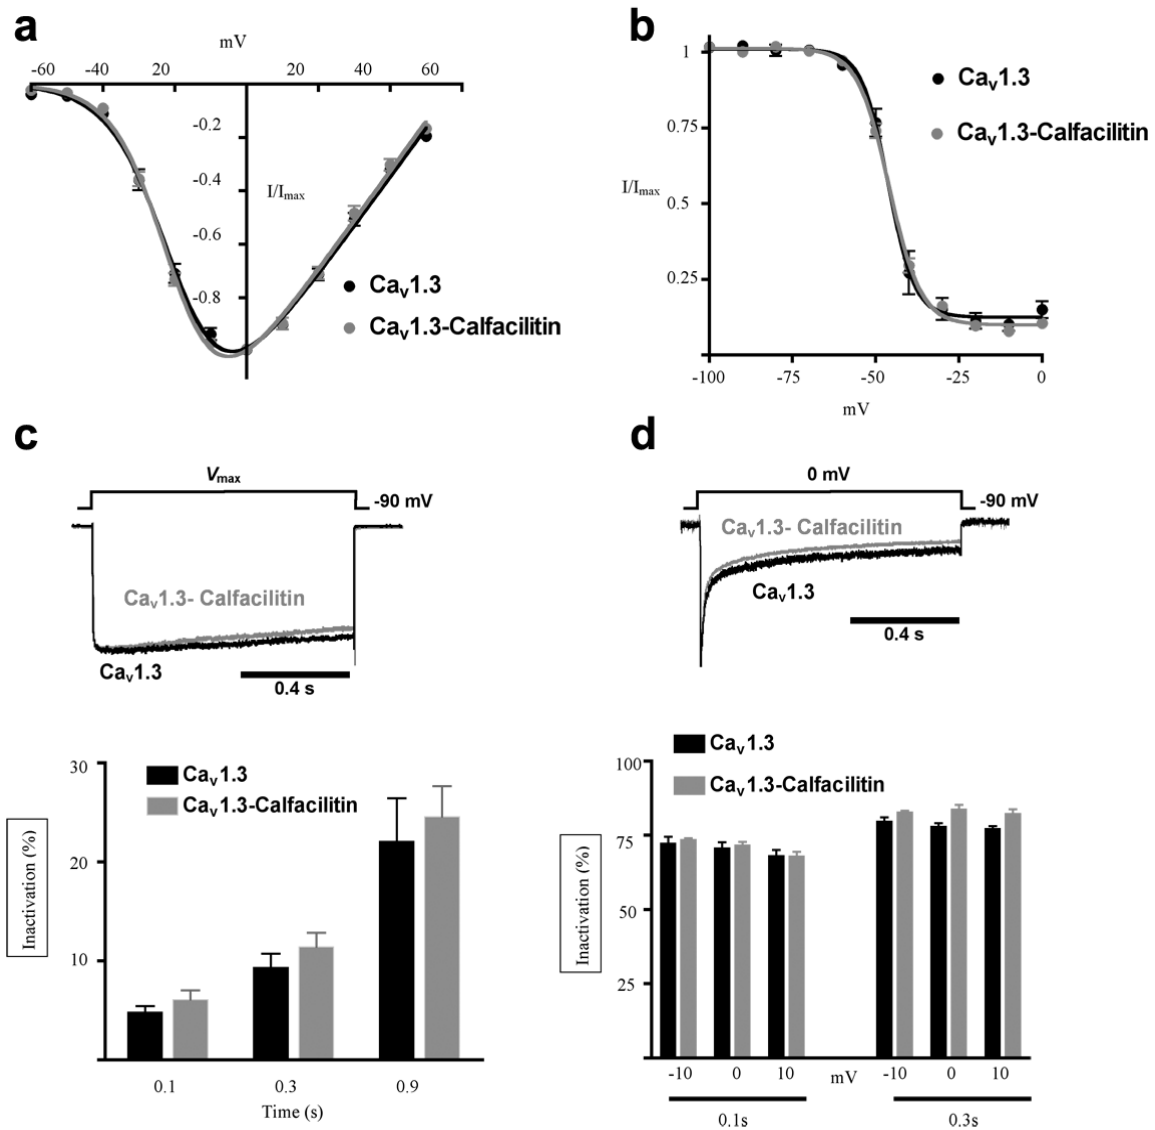

**a.** Normalized  $I-V$  curves for  $I_{Ca}$ .  $V_{0.5}$  ( $Ca_v1.3$ ) =  $-19.36 \pm 0.64$  mV ( $n=7$ ).  $V_{0.5}$  ( $Ca_v1.3$ -Calfacilitin) =  $-20.0 \pm 0.53$  mV ( $n=5$ ).  $P > 0.05$  (Student's  $t$ -test). **b.** Steady-state inactivation properties.  $V_{0.5}$  ( $Ca_v1.3$ ) =  $-46.3 \pm 0.64$  mV ( $n=7$ ).  $V_{0.5}$  ( $Ca_v1.3$ -Calfacilitin) =  $-45.9 \pm 0.3$  mV ( $n=7$ ).  $P > 0.05$  (Student's  $t$ -test). **c.** Representative  $I_{Ba}$  during depolarizations to  $V_{max}$  and percentage of  $I_{Ba}$  inactivation. No difference was found between the presence and absence of calfacilitin.  $N_{cell}=7$  ( $Ca_v1.3$ ).  $N_{cell}=5$  ( $Ca_v1.3$ -Calfacilitin). **d.** Representative  $I_{Ca}$  and percentage  $I_{Ca}$  inactivation during depolarizations to -10, 0 and 10 mV at 0.1 and 0.3 s after peak current. There is no difference between the presence and absence of calfacilitin.  $N_{cell}=7$  ( $Ca_v1.3$ ).  $N_{cell}=7$  ( $Ca_v1.3$ -Calfacilitin). Error bars in all panels correspond to the standard error of the mean.

**Supplementary Fig. S3. Nicardipine treatment does not affect expression of *Chordin*.**

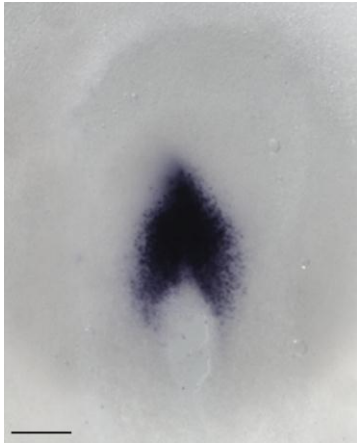

Embryo treated with Nicardipine as shown in Fig. 5c, after in situ hybridisation with the organizer marker *Chordin*. This embryo is at stage 4<sup>+</sup> and expression is confined, as in normal embryos, to the organizer and emerging head process (dark blue signal). Scale bar: 100µm.

**Supplementary Fig. S4. Morpholino directed against an exon-intron junction of Calfacilitin causes exon-skipping and generates a truncated form.**

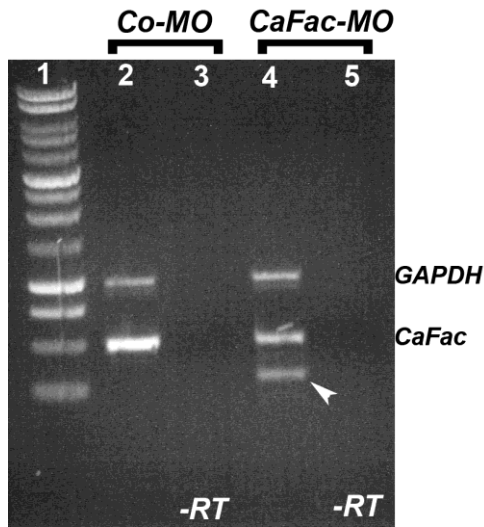

Embryos were electroporated with Control (Co-MO, Lanes 2-3) or Calfacilitin (CaFac-MO, Lanes 4-5) morpholinos, the latter targeting a splice junction. The products were amplified by RT-PCR. Lane 1, size markers (Promega 1kb ladder; the lowest four markers correspond to 253, 500, 750 and 1000 bp respectively, from bottom to top). Lanes 3 and 5 contain the same samples as 2 and 3 but Reverse Transcriptase (RT) was omitted as a control. Glyceraldehyde-3-Phosphate Dehydrogenase (GAPDH) was used as a loading control. The Morpholino causes a decrease in the Calfacilitin (CaFac) band and appearance of a smaller band corresponding to a truncated version caused by exon skipping (arrowhead). Note that electroporation targets a mosaic of cells therefore each sample is a mixture of targeted and normal cells; this can account for the remaining full-length Calfacilitin in the CaFac-MO sample.
